# Supplementary material for: Genetic dissection of climacteric fruit ripening in a melon population segregating for ripening behavior
Source: Springer Nature journal article supplement (doi:10.1038/s41438-020-00411-z), 2020-11-01

A

## Chromosome 2

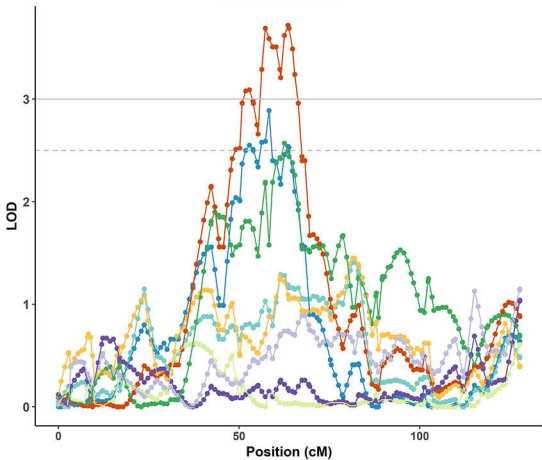

Trait

DAPE-T3 DAPP-T3 ETH-T3 WEP-T3  
 DAPE-T4 DAPP-T4 ETH-T4 WEP-T4

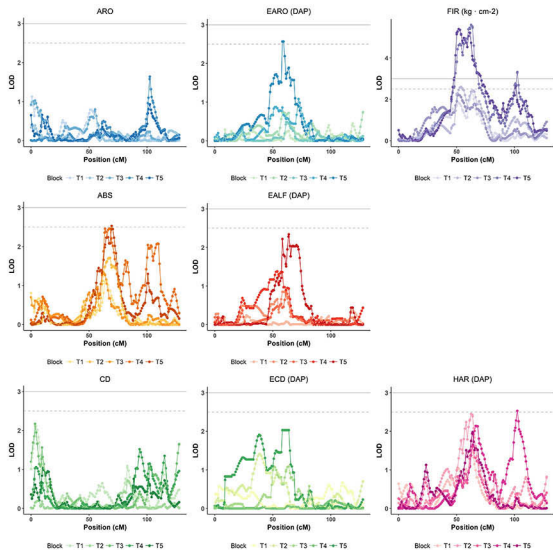

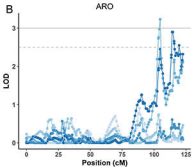

Block T1 T2 T3 T4 T5

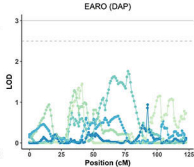

Block T1 T2 T3 T4 T5

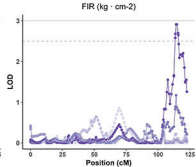

Block T1 T2 T3 T4 T5

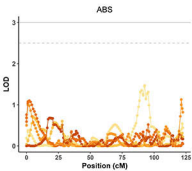

Block T1 T2 T3 T4 T5

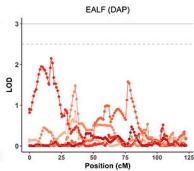

Block T1 T2 T3 T4 T5

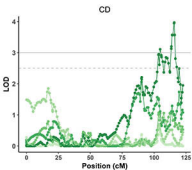

Block T1 T2 T3 T4 T5

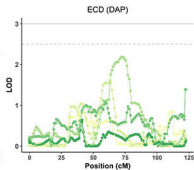

Block T1 T2 T3 T4 T5

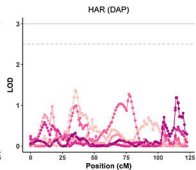

Block T1 T2 T3 T4 T5

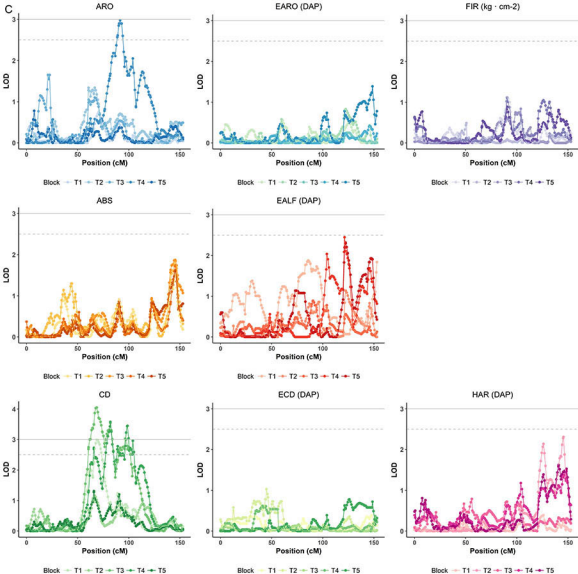



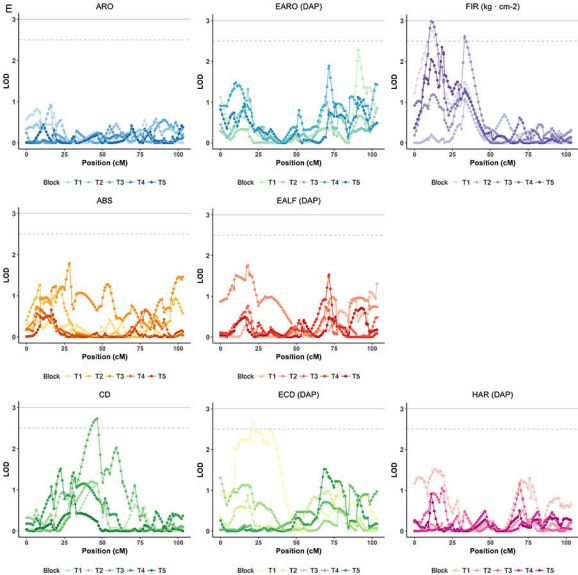

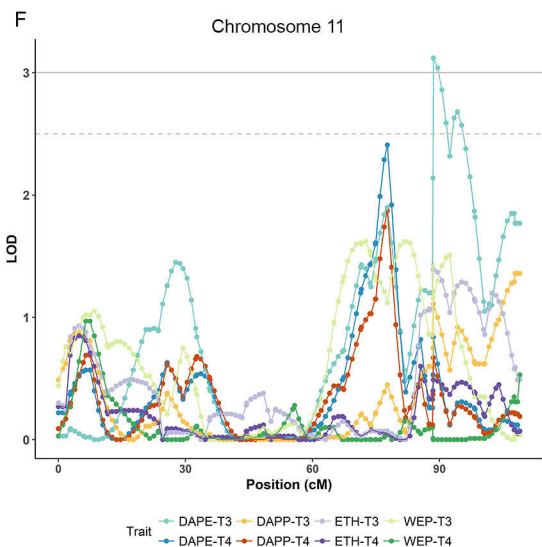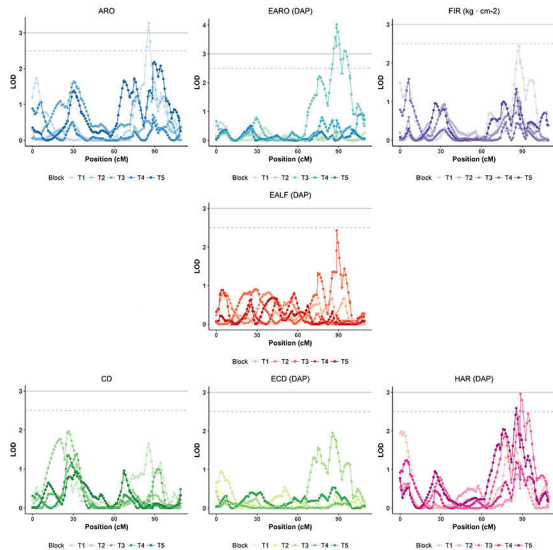

Supplement: MOESM6 [file 41438_2020_411_MOESM6_ESM.pdf]
